# Supplementary material for: Re-examining the 4.2 ka BP event in foraminifer isotope records from the Indus River delta in the Arabian Sea
Source: Copernicus journal article supplement (doi:10.5194/cp-2018-104), 2018-09-03
Supplement: Supplementary file 1 [file cp-2018-104-supplement.pdf]

1025 Supplemental figures and tables

1026

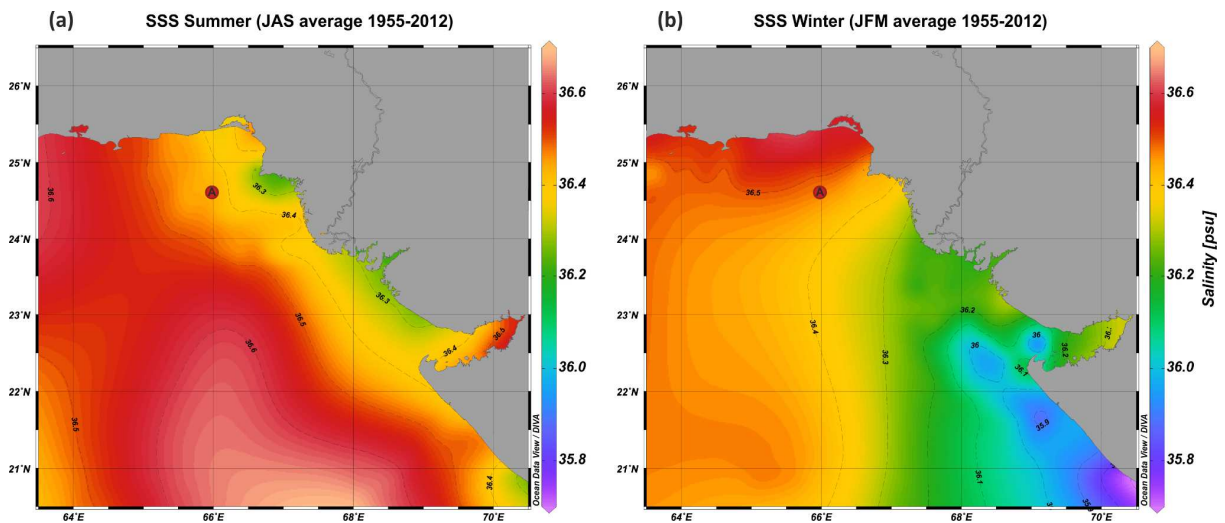

1027

1028

1029

1030

1031

1032

1033

**Figure S1.** Mean surface salinity for 1955-2012, with data from the 2013 World Ocean Atlas (WOA) at 0.25° resolution (Zweng et al., 2013). Salinity contours are shown for **a.** summer (JAS) and **b.** winter (JFM). The Indus River is outlined. Note that over the time window of this dataset, modern Indus River discharge has been reduced by >50% due to barrages and irrigation (Ahmad et al., 2001). Plots created with Ocean Data Viewer (ODV).

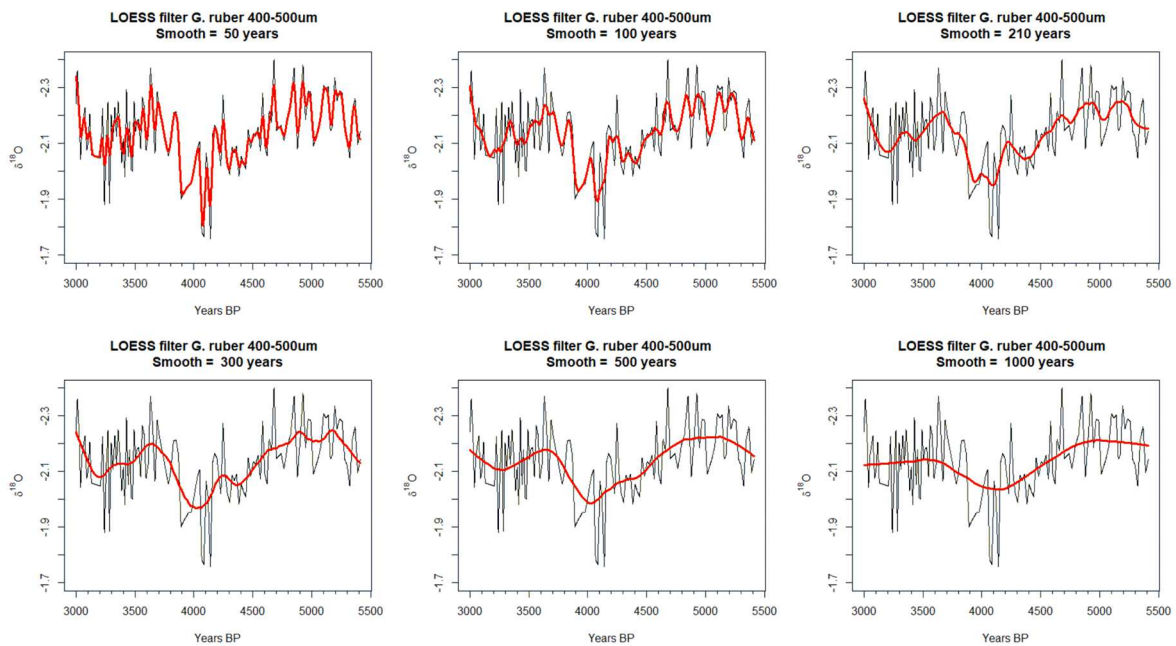

1034

1035

1036

1037

**Figure S2.** Comparison of loess smoothing windows of 50, 100, 210, 300, 500, and 1000 years for *G. ruber* in the 400-500µm fraction.

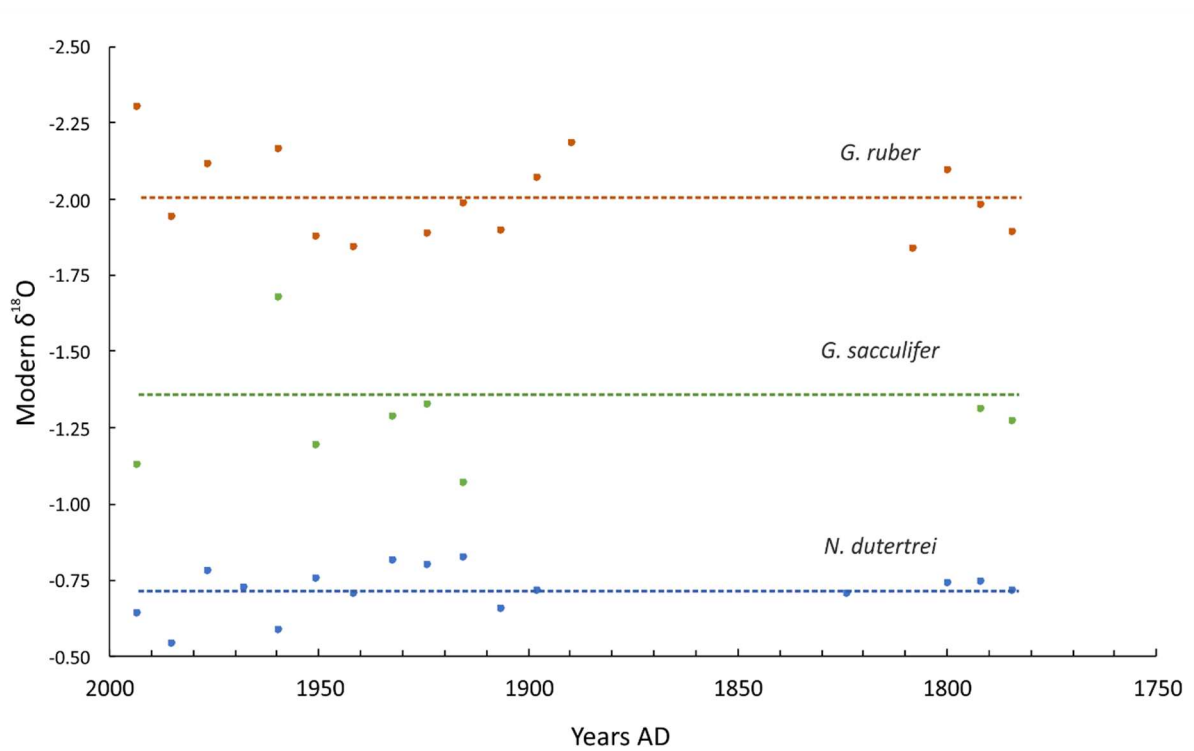

1038  
1039  
1040  
1041  
1042  
1043  
1044

**Figure S3.** Modern  $\delta^{18}\text{O}$  values of calcite, spanning approximately the last 200 years, measured from surface sediment samples for all three species at the size fractions 315-400 $\mu\text{m}$ . Averages values for the last 200 years (~1780-1993 AD) are compared to the period 5.4-3.0 ka BP: -2.01‰ (modern) and -1.90‰ (old) for *G. ruber* (orange), -1.28‰ (modern) and -1.31‰ (old) for *G. sacculifer* (green), and -0.72‰ (modern) and -0.76‰ (old) for *N. dutertrei* (blue).

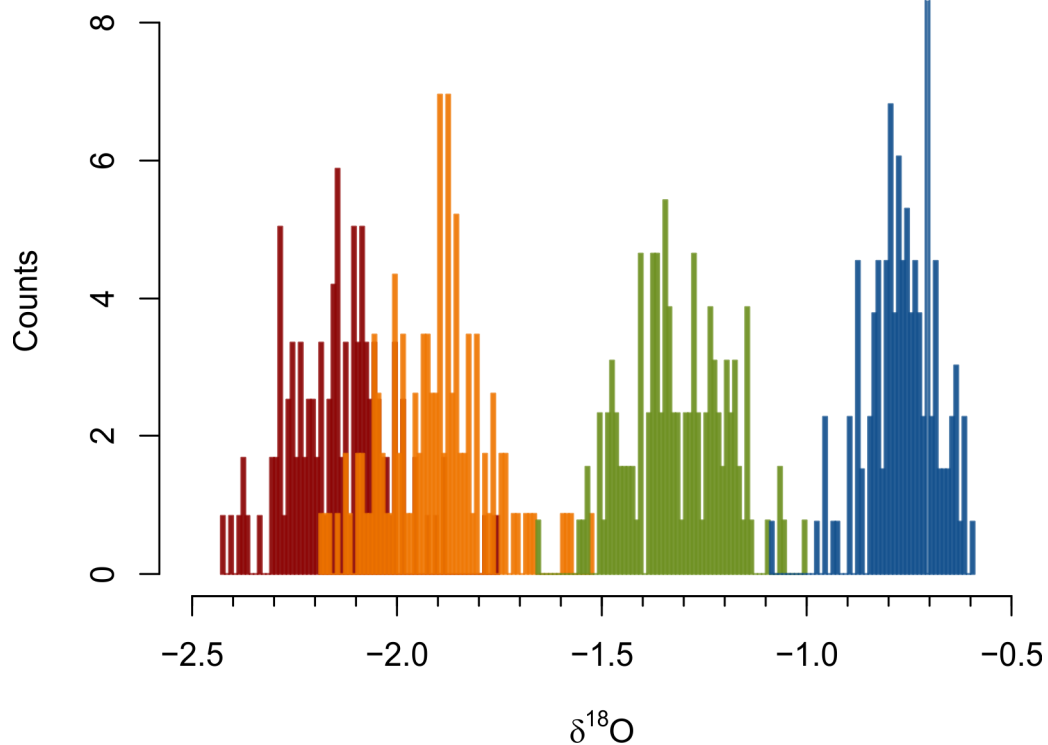

1045  
1046  
1047  
1048

**Figure S4.** Frequency distributions of  $\delta^{18}\text{O}$  data during 5.4-3.0 ka BP for *G. ruber* 400-500 $\mu\text{m}$  (red), *G. ruber* 315-400 $\mu\text{m}$  (orange), *G. sacculifer* 315-400 $\mu\text{m}$  (green), *N. dutertrei* 315-400 $\mu\text{m}$  (blue).

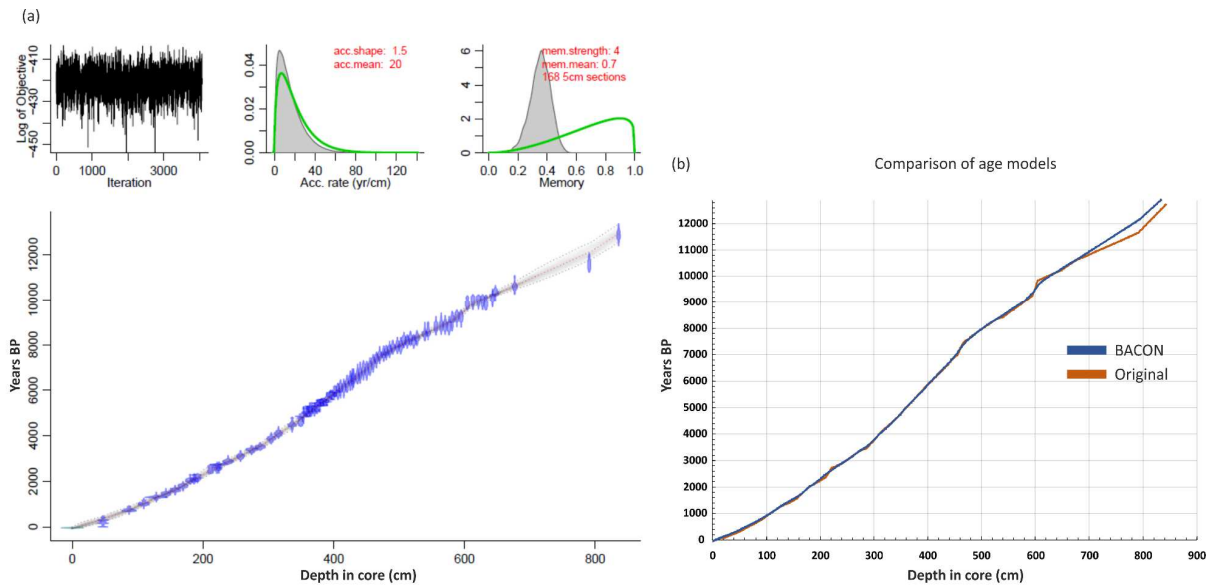

1049  
1050  
1051  
1052  
1053

**Figure S5. a.** BACON age-depth model with calibrated dates shown in blue **b.** Age-depth model comparison with the original published age model from Staubwasser et al. (2003) (orange) and the new age model based on BACON software (blue).

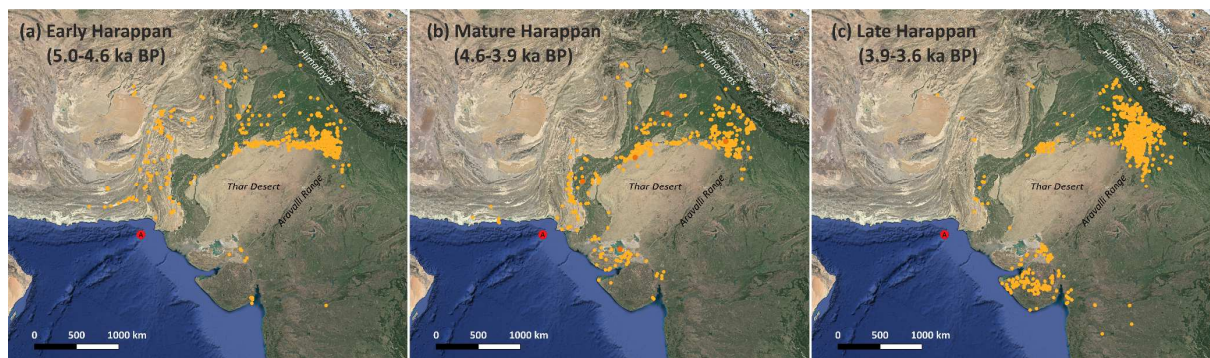

1054  
1055  
1056  
1057  
1058  
1059  
1060  
1061  
1062

**Figure S6.** Indus site distributions (yellow points) during the **a.** Early Harappan (~5.0-4.6 ka BP), **b.** Mature Harappan (~4.6-3.9 ka BP), and **c.** Late Harappan (~3.9-3.6 ka BP). Orange sites show larger Harappan cities during the Mature Harappan period (Dholavira, Mohenjo Daro, Ganweriwala, Harappa, and Rakhigarhi from bottom to top), core 63KA shown by red circle, background terrain from Google Earth.

**Table S1.** Main statistical parameters of the  $\delta^{18}\text{O}$  data.

|                                | <i>G. ruber</i><br>400-500 $\mu\text{m}$ | <i>G. ruber</i><br>315-400 $\mu\text{m}$ | <i>G. sacculifer</i><br>315-400 $\mu\text{m}$ | <i>N. dutertrei</i><br>315-400 $\mu\text{m}$ |
|--------------------------------|------------------------------------------|------------------------------------------|-----------------------------------------------|----------------------------------------------|
| <i>n</i>                       | 119                                      | 115                                      | 129                                           | 132                                          |
| <i>Minimum</i>                 | -2.423                                   | -2.190                                   | -1.660                                        | -1.090                                       |
| <i>Maximum</i>                 | -1.752                                   | -1.520                                   | -1.000                                        | -0.590                                       |
| <i>1<sup>st</sup> Quartile</i> | -2.232                                   | -1.995                                   | -1.400                                        | -0.810                                       |
| <i>3<sup>rd</sup> Quartile</i> | -2.068                                   | -1.830                                   | -1.220                                        | -0.700                                       |
| <i>Mean</i>                    | -2.139                                   | -1.901                                   | -1.312                                        | -0.761                                       |
| <i>Median</i>                  | -2.144                                   | -1.890                                   | -1.320                                        | -0.760                                       |
| <i>Sum</i>                     | -254.58                                  | -218.66                                  | -169.26                                       | -100.46                                      |
| <i>SE Mean</i>                 | 0.012                                    | 0.012                                    | 0.011                                         | 0.007                                        |
| <i>LCL Mean</i>                | -2.163                                   | -1.926                                   | -1.333                                        | -0.776                                       |
| <i>UCL Mean</i>                | -2.116                                   | -1.877                                   | -1.291                                        | -0.746                                       |
| <i>Variance</i>                | 0.016                                    | 0.017                                    | 0.015                                         | 0.007                                        |
| <i>Stdev</i>                   | 0.128                                    | 0.131                                    | 0.122                                         | 0.085                                        |

|          |       |       |        |        |
|----------|-------|-------|--------|--------|
| Skewness | 0.408 | 0.288 | -0.011 | -0.592 |
| Kurtosis | 0.511 | 0.174 | -0.364 | 0.850  |

1063  
1064  
1065  
1066

**Table S2.** Age-Model calibration with BACON software.

| <i>Depth (cm)</i> | <i><sup>14</sup>C date</i> | <i>Error (±1σ)</i> | <i>Reservoir (years)</i> | <i>IntCal13 min age BP</i> | <i>IntCal13 max age BP</i> | <i>IntCal13 mean age BP</i> |
|-------------------|----------------------------|--------------------|--------------------------|----------------------------|----------------------------|-----------------------------|
| surface           | -                          | -                  | -                        | -                          | -                          | -43                         |
| 47                | 790                        | 30                 | 565                      | 267                        | 309                        | 288                         |
| 87                | 1370                       | 35                 | 565                      | 678                        | 780                        | 729                         |
| 109.5             | 1665                       | 30                 | 565                      | 952                        | 1062                       | 1007                        |
| 128.5             | 1955                       | 25                 | 565                      | 1283                       | 1339                       | 1311                        |
| 143.5             | 2115                       | 35                 | 565                      | 1369                       | 1529                       | 1449                        |
| 157.5             | 2270                       | 25                 | 565                      | 1552                       | 1634                       | 1593                        |
| 169.5             | 2430                       | 25                 | 565                      | 1728                       | 1869                       | 1799                        |
| 180.5             | 2640                       | 25                 | 565                      | 1988                       | 2122                       | 2055                        |
| 186.5             | 2675                       | 35                 | 565                      | 1993                       | 2154                       | 2074                        |
| 191.5             | 2720                       | 30                 | 565                      | 2044                       | 2184                       | 2114                        |
| 211.5             | 3000                       | 35                 | 565                      | 2356                       | 2541                       | 2449                        |
| 221.5             | 3110                       | 40                 | 565                      | 2491                       | 2602                       | 2547                        |
| 224.5             | 3145                       | 25                 | 565                      | 2708                       | 2758                       | 2733                        |
| 238.5             | 3340                       | 25                 | 565                      | 2836                       | 2929                       | 2883                        |
| 257.5             | 3510                       | 30                 | 565                      | 2999                       | 3181                       | 3090                        |
| 274.5             | 3730                       | 30                 | 565                      | 3343                       | 3451                       | 3397                        |
| 287.5             | 3850                       | 30                 | 565                      | 3450                       | 3576                       | 3513                        |
| 304.5             | 4145                       | 30                 | 565                      | 3828                       | 3975                       | 3902                        |
| 315.5             | 4310                       | 30                 | 565                      | 4062                       | 4159                       | 4111                        |
| 336.5             | 4570                       | 40                 | 565                      | 4408                       | 4578                       | 4493                        |
| 349.5             | 4655                       | 40                 | 565                      | 4512                       | 4711                       | 4612                        |
| 353.5             | 4870                       | 30                 | 565                      | 4832                       | 4892                       | 4862                        |
| 357.5             | 5005                       | 35                 | 565                      | 4952                       | 5079                       | 5016                        |
| 360.5             | 4980                       | 30                 | 565                      | 4868                       | 5057                       | 4963                        |
| 363.5             | 5080                       | 30                 | 565                      | 5050                       | 5194                       | 5122                        |
| 366.5             | 5105                       | 35                 | 565                      | 5053                       | 5189                       | 5121                        |
| 370.5             | 5070                       | 35                 | 565                      | 5046                       | 5300                       | 5173                        |
| 374.5             | 5160                       | 40                 | 565                      | 5372                       | 5463                       | 5418                        |
| 378.5             | 5210                       | 40                 | 565                      | 5303                       | 5469                       | 5386                        |
| 381.5             | 5315                       | 30                 | 565                      | 5460                       | 5585                       | 5523                        |
| 385.5             | 5315                       | 35                 | 565                      | 5453                       | 5586                       | 5520                        |
| 389.5             | 5420                       | 35                 | 565                      | 5580                       | 5654                       | 5617                        |
| 395.5             | 5635                       | 35                 | 565                      | 5741                       | 5907                       | 5824                        |
| 398.5             | 5610                       | 35                 | 565                      | 5713                       | 5904                       | 5809                        |
| 402               | 5750                       | 40                 | 565                      | 5891                       | 6008                       | 5950                        |
| 406.5             | 5830                       | 35                 | 638                      | 5899                       | 6002                       | 5951                        |
| 410.5             | 5965                       | 40                 | 638                      | 5994                       | 6210                       | 6102                        |
| 415.5             | 5980                       | 45                 | 638                      | 5997                       | 6216                       | 6107                        |

|       |       |    |      |       |       |       |
|-------|-------|----|------|-------|-------|-------|
| 420.5 | 6120  | 45 | 638  | 6201  | 6351  | 6276  |
| 425.5 | 6265  | 45 | 638  | 6311  | 6490  | 6401  |
| 428.5 | 6335  | 55 | 638  | 6395  | 6639  | 6517  |
| 430.5 | 6345  | 60 | 638  | 6396  | 6657  | 6527  |
| 436.5 | 6440  | 40 | 638  | 6495  | 6678  | 6587  |
| 440.5 | 6540  | 55 | 638  | 6627  | 6883  | 6755  |
| 445.5 | 6665  | 45 | 638  | 6773  | 6984  | 6879  |
| 450.5 | 6650  | 40 | 638  | 6749  | 6948  | 6849  |
| 455.5 | 6960  | 45 | 824  | 6912  | 7162  | 7037  |
| 460.5 | 7155  | 45 | 824  | 7166  | 7331  | 7249  |
| 465.5 | 7310  | 45 | 824  | 7308  | 7480  | 7394  |
| 470.5 | 7480  | 55 | 824  | 7438  | 7606  | 7522  |
| 476.5 | 7550  | 50 | 824  | 7551  | 7670  | 7611  |
| 480.5 | 7815  | 55 | 1011 | 7571  | 7743  | 7657  |
| 485.5 | 7920  | 70 | 1011 | 7617  | 7867  | 7742  |
| 490.5 | 8070  | 50 | 1011 | 7788  | 7976  | 7882  |
| 497.5 | 8130  | 55 | 1011 | 7837  | 8027  | 7932  |
| 502.5 | 8115  | 55 | 1011 | 7828  | 8020  | 7924  |
| 507.5 | 8400  | 60 | 1011 | 8148  | 8345  | 8247  |
| 512.5 | 8350  | 50 | 1011 | 8020  | 8218  | 8119  |
| 517.5 | 8490  | 50 | 1011 | 8194  | 8381  | 8288  |
| 522.5 | 8355  | 60 | 1011 | 8023  | 8312  | 8168  |
| 527.5 | 8510  | 60 | 1011 | 8194  | 8400  | 8297  |
| 539.5 | 8790  | 60 | 1118 | 8384  | 8563  | 8474  |
| 544.5 | 8880  | 55 | 1118 | 8425  | 8631  | 8528  |
| 556.5 | 9060  | 50 | 1118 | 8637  | 8986  | 8812  |
| 564.5 | 9120  | 70 | 1118 | 8636  | 9026  | 8831  |
| 570.5 | 9110  | 50 | 1118 | 8698  | 9007  | 8853  |
| 576.5 | 9060  | 50 | 1118 | 8637  | 8986  | 8812  |
| 581.5 | 9260  | 50 | 1118 | 8999  | 9153  | 9076  |
| 588.5 | 9390  | 50 | 1118 | 9119  | 9430  | 9275  |
| 595   | 9370  | 60 | 1118 | 9076  | 9419  | 9248  |
| 604.5 | 9570  | 50 | 781  | 9602  | 9952  | 9777  |
| 613   | 9660  | 70 | 781  | 9736  | 10194 | 9965  |
| 621.5 | 9670  | 50 | 781  | 9884  | 10189 | 10037 |
| 628   | 9650  | 70 | 781  | 9732  | 10188 | 9960  |
| 633   | 9570  | 80 | 781  | 9581  | 9963  | 9772  |
| 643   | 9770  | 70 | 781  | 9906  | 10251 | 10079 |
| 647.5 | 9920  | 60 | 781  | 10206 | 10436 | 10321 |
| 677   | 10160 | 60 | 781  | 10480 | 10752 | 10616 |
| 791   | 11145 | 50 | 1095 | 11325 | 11806 | 11566 |
| 836   | 12285 | 55 | 1300 | 12726 | 12995 | 12861 |
